# Supplementary material for: Housing Cost Burden and Health Decline Among Low- and Moderate-Income Older Renters
Source: Oxford University Press journal article supplement (doi:10.1093/geronb/gbab184), 2021-10-05
Supplement: gbab184_suppl_supplementary_tables.pdf [file gbab184_suppl_supplementary_tables.pdf]

Supplementary Table 1.

*Multinomial Logistic Regression Models Predicting Death or Attrition Between 2015 and 2016  
Among Low-and Moderate-Income Older Renters*

|                                           | Death      |          | Attrition  |          |
|-------------------------------------------|------------|----------|------------|----------|
|                                           | Unadjusted | Adjusted | Unadjusted | Adjusted |
| Housing Cost Burden (ref = No HCB)        |            |          |            |          |
| Moderate HCB                              | 1.87†      | 2.18†    | 2.31*      | 1.98†    |
| Severe HCB                                | 0.76       | 0.92     | 4.03***    | 3.30**   |
| Female                                    |            | 0.61     |            | 2.08*    |
| Age (1-6 scale)                           |            | 1.29*    |            | 0.78*    |
| Race/Ethnicity (ref = Non-Hispanic White) |            |          |            |          |
| Non-Hispanic Black                        |            | 0.78     |            | 1.17     |
| Hispanic                                  |            | 0.36     |            | 1.50     |
| Another race/ethnicity                    |            | 2.56     |            | 1.45     |
| Lives alone                               |            | 1.17     |            | 0.86     |
| Education (ref = below high school)       |            |          |            |          |
| High school                               |            | 1.47     |            | 0.75     |
| Beyond high school                        |            | 0.68     |            | 0.55     |
| Annual income (logged)                    |            | 1.41     |            | 1.03     |
| Medicaid                                  |            | 1.82     |            | 0.85     |
| Housing quality issue                     |            | 2.14     |            | 0.74     |
| Neighborhood physical disorder            |            | 0.07***  |            | 1.03     |
| Low neighborhood social cohesion          |            | 1.01     |            | 1.38     |
| Constant                                  |            | 0.00†    |            | 0.06†    |

*Note.* Referent is participants who are alive and not lost to attrition between 2015 and 2016.

Coefficients are reported as relative risk ratios; regressions employ weights and adjust for standard errors to account for complex survey design. HCB = Housing Cost Burden. (N = 1,064)

† $p < 0.10$ . \* $p < 0.05$ . \*\* $p < 0.01$ . \*\*\* $p < 0.001$ .

Supplemental Table 2.

*Multinomial Logistic Regression Models Predicting No Longer a Renter, Death, or Attrition Between 2015 and 2017 Among Low- and Moderate-Income Older Renters*

|                                           | No Longer a Renter |          | Death      |          | Attrition  |          |
|-------------------------------------------|--------------------|----------|------------|----------|------------|----------|
|                                           | Unadjusted         | Adjusted | Unadjusted | Adjusted | Unadjusted | Adjusted |
| Housing Cost Burden (ref = No HCB)        |                    |          |            |          |            |          |
| Moderate HCB                              | 1.07               | 1.04     | 1.76*      | 1.84*    | 2.06**     | 1.66*    |
| Severe HCB                                | 1.25               | 1.20     | 1.18       | 1.19     | 2.65***    | 2.04*    |
| Female                                    |                    | 1.22     |            | 0.94     |            | 1.31     |
| Age (1-6 scale)                           |                    | 1.15     |            | 1.32**   |            | 0.83*    |
| Race/Ethnicity (ref = Non-Hispanic White) |                    |          |            |          |            |          |
| Non-Hispanic Black                        |                    | 0.96     |            | 0.53*    |            | 0.66     |
| Hispanic                                  |                    | 0.59     |            | 0.66     |            | 1.46     |
| Another race/ethnicity                    |                    | 1.27     |            | 1.88     |            | 1.90     |
| Lives alone                               |                    | 0.62†    |            | 1.02     |            | 0.68†    |
| Education (ref = below high school)       |                    |          |            |          |            |          |
| High school                               |                    | 1.50     |            | 1.04     |            | 0.84     |
| Beyond high school                        |                    | 1.25     |            | 0.80     |            | 0.69     |
| Annual income (logged)                    |                    | 1.03     |            | 1.02     |            | 0.94     |
| Medicaid                                  |                    | 0.96     |            | 1.42     |            | 0.64     |
| Housing quality issue                     |                    | 1.19     |            | 1.84†    |            | 0.99     |
| Neighborhood physical disorder            |                    | 0.70     |            | 0.22**   |            | 0.83     |
| Low neighborhood social cohesion          |                    | 0.84     |            | 0.86     |            | 1.67**   |
| Constant                                  |                    | 0.08     |            | 0.05*    |            | 0.66     |

*Note.* Referent is participants who are renters, alive and not lost to attrition between 2015 and 2017. Coefficients are reported as relative risk ratios; regressions employ weights and adjust for standard errors to account for complex survey design. HCB = Housing Cost Burden. (N = 1,064)

†p < 0.10. \*p < 0.05. \*\*p < 0.01. \*\*\*p < 0.001.
